# Supplementary material for: Cancer-associated fibroblasts induce trastuzumab resistance in HER2 positive breast cancer cells
Source: Royal Society of Chemistry journal article supplement (doi:10.1039/c4mb00710g), 2015-02-04
Supplement: c4mb00710g6.pdf [file c4mb00710g6.pdf]

**Table S1. Patient characteristics of breast cancer samples used for culturing of CAFs and NAFs**

| <b>Cell line</b> | <b>Age</b> | <b>surgery</b> | <b>pathology</b>     | <b>Grade</b> | <b>Stage</b> | <b>ER</b> | <b>PR</b> | <b>HER2</b> | <b>FISH</b> | <b>ki67</b> |
|------------------|------------|----------------|----------------------|--------------|--------------|-----------|-----------|-------------|-------------|-------------|
| CAF11            | 52         | Mastectomy     | IDC                  | II-III       | T2N3M0       | -         | -         | +++         | +           | 70%         |
| CAF23            | 56         | Mastectomy     | IDC                  | II           | T2N0M3       | -         | -         | +++         | +           | 50%         |
| CAF64            | 48         | Mastectomy     | IDC                  | III          | T1N1M0       | +++       | +         | +++         | +           | 35%         |
| NAF1             | 34         | lumpectomy     | Normal breast tissue |              |              |           |           |             |             |             |
| NAF2             | 29         | lumpectomy     | Normal breast tissue |              |              |           |           |             |             |             |
| NAF3             | 32         | lumpectomy     | Normal breast tissue |              |              |           |           |             |             |             |
