# Supplementary figures and images for: Cancer-associated fibroblasts induce trastuzumab resistance in HER2 positive breast cancer cells
Source: Royal Society of Chemistry journal article supplement (doi:10.1039/c4mb00710g), 2015-02-04

**A**

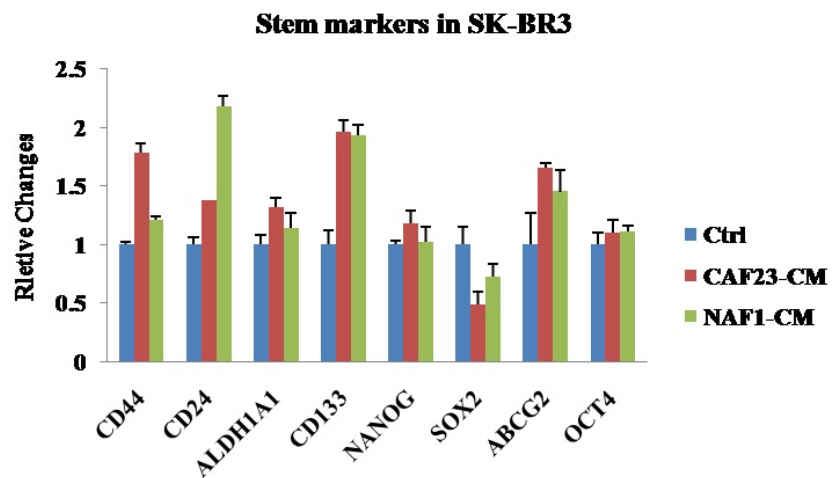

**B**

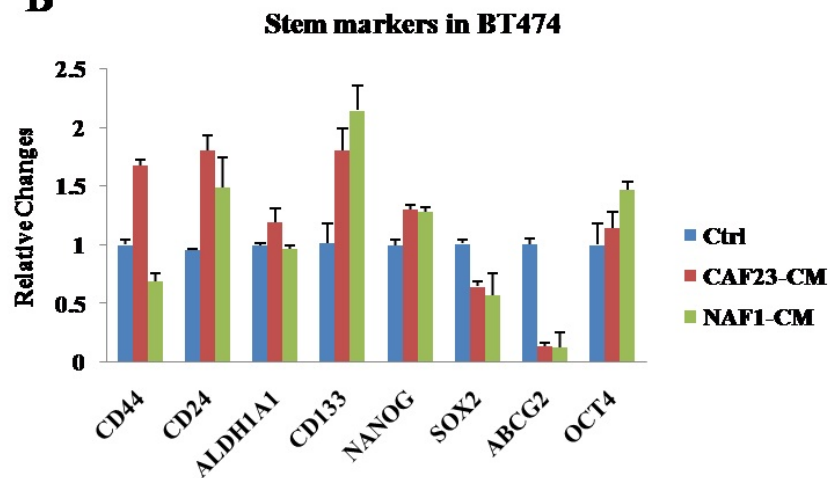

**C**

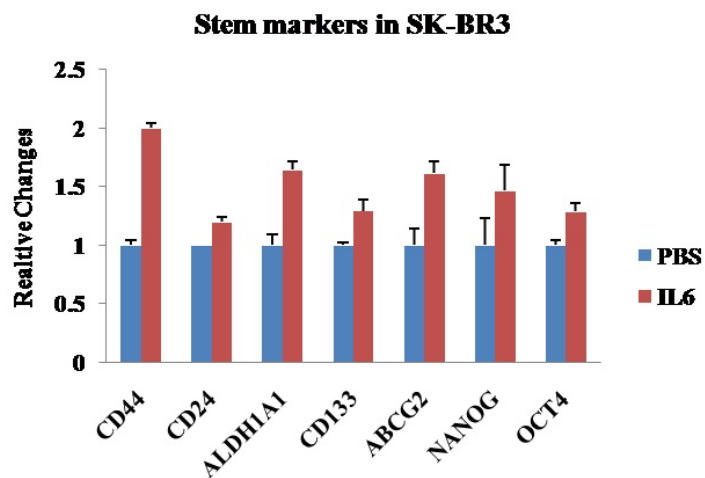

**D**

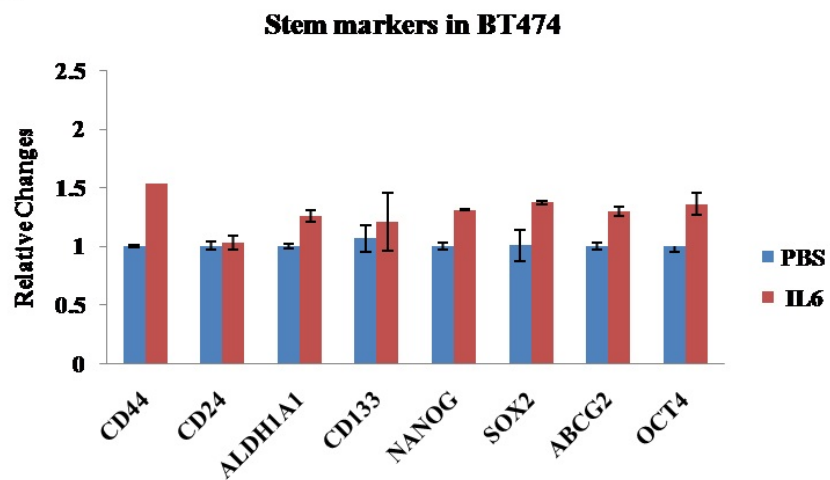

Supplement: c4mb00710g2.pdf [file c4mb00710g2.pdf]
